# Supplementary figures and images for: Are Type and Screen Samples Routinely Necessary Before Laparoscopic Cholecystectomy?
Source: Springer Nature journal article supplement (doi:10.1007/s11605-020-04515-8), 2020-01-28

Appendix 3
Figure 1: Flow-chart of Patients Included and Excluded from Analysis


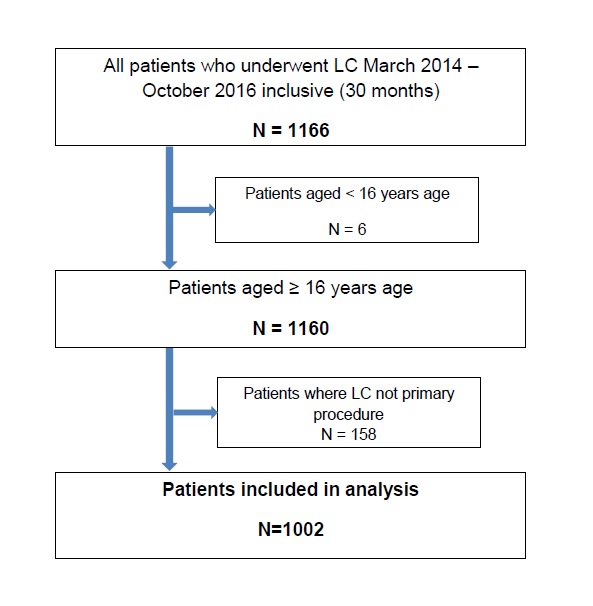

Supplement: MOESM3 [file 17602474]
